# Supplementary material for: Poly(lactic acid)/Plasticizer/Nano-Silica Ternary Systems: Properties Evolution and Effects on Degradation Rate
Source: MDPI journal article supplement (doi:10.3390/nano13071284), 2023-04-05
Supplement: s1 [file s1]

# SUPPLEMENTARY MATERIALS

## Poly(lactic acid)/plasticizer/nano-silica ternary systems: properties evolution and effects on degradation rate

Roberta Capuano <sup>1,2</sup>, Roberto Avolio <sup>1,\*</sup>, Rachele Castaldo <sup>1</sup>, Mariacristina Cocca <sup>1</sup>, Giovanni Dal Poggetto <sup>1</sup>, Gennaro Gentile <sup>1</sup>, Maria Emanuela Errico <sup>1,\*</sup>

<sup>1</sup> Institute for Polymers, Composites and Biomaterials—IPCB, National Research Council of Italy (CNR), Via Campi Flegrei 34, 80078 Pozzuoli, Italy; roberta.capuano@ipcb.cnr.it (R.C.); rachele.castaldo@ipcb.cnr.it (R.C.); mariacristina.cocca@ipcb.cnr.it (M.C.); giovanni.dalpoggetto@ipcb.cnr.it (G.D.P.); gennaro.gentile@ipcb.cnr.it (G.G.)

<sup>2</sup> Department of Mechanical and Industrial Engineering—DIMI, University of Brescia, Via Branze 38, 25121 Brescia, Italy

\* Correspondence: roberto.avolio@ipcb.cnr.it (R.A.); mariaemanuela.errico@ipcb.cnr.it (M.E.E.)

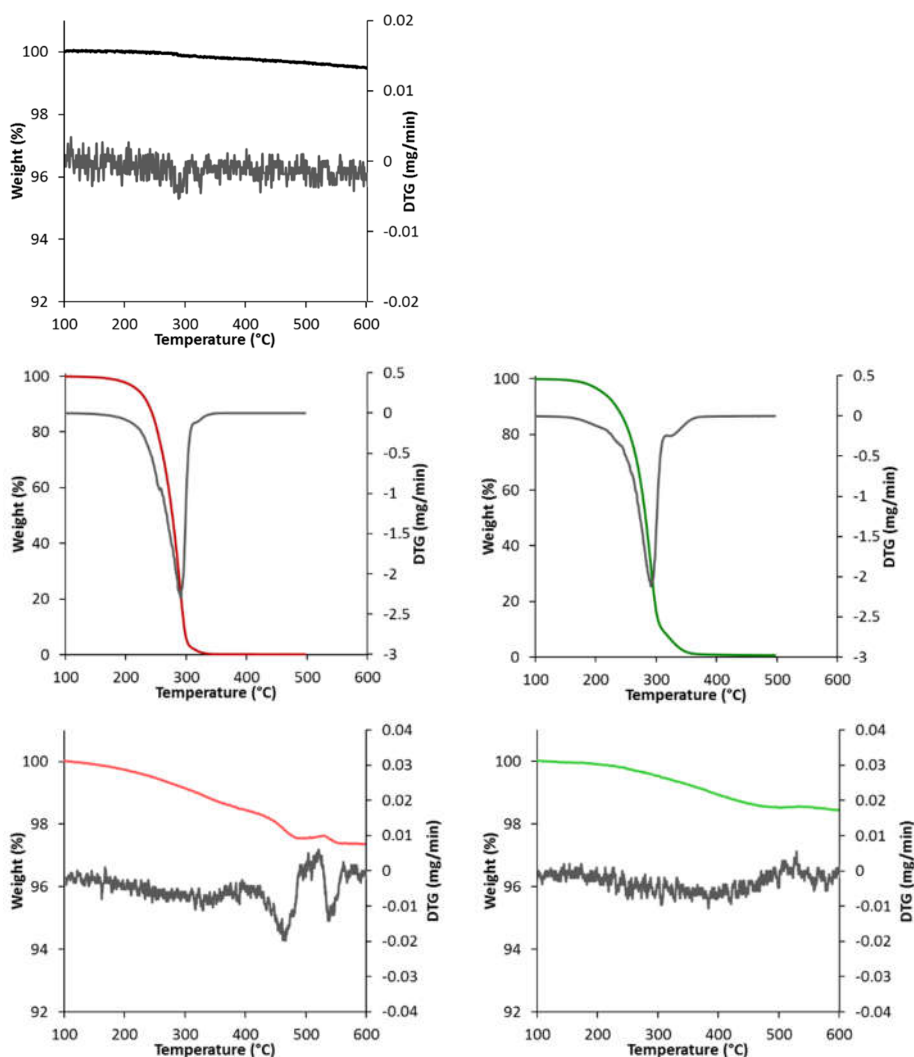

**Figure S1.** TGA and their derivative (DTG) curves of neat SiNP, neat OLA\_OH and OLA\_COOH, compared to the curves recorded on the insoluble fraction recovered from OLA\_SiNP masterbatches after solvent extraction.

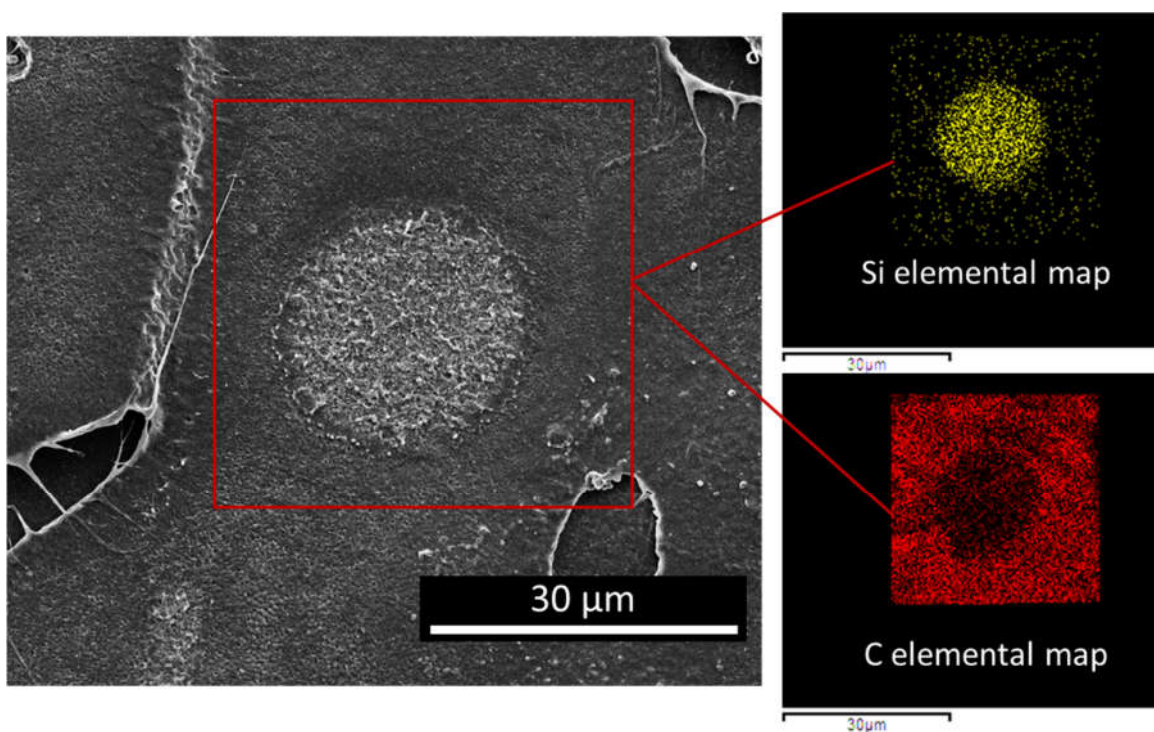

**Figure S2.** SEM micrograph of the fracture surface of a representative sample, with EDX elemental map showing the distribution of carbon and silicon atoms.

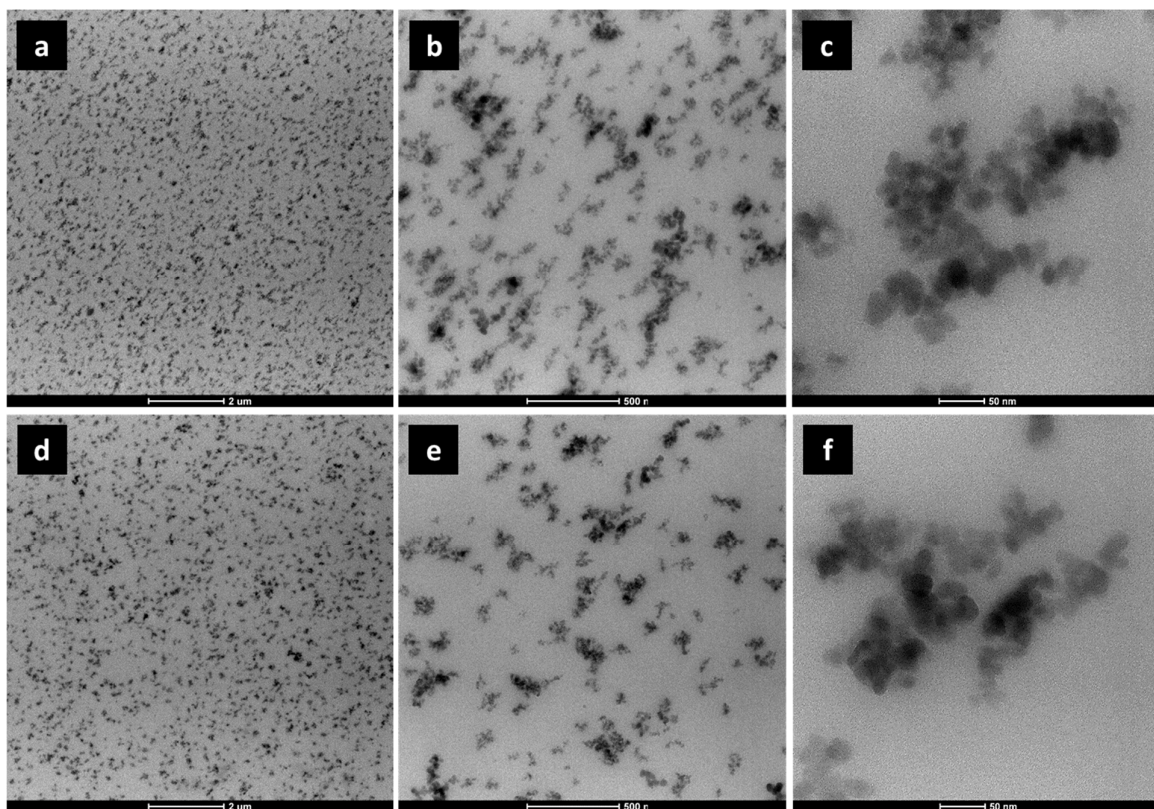

**Figure S3.** TEM micrographs at different magnification of samples S3\_OH (a, b, c) and S3\_COOH (d, e, f)
